# Supplementary material for: Synergistic effect of heterointerface engineering and oxygen vacancy in electro-spun polymer fibres derived carbon-supported 1D hierarchical WO3/SnO2 nanostructures for high-performance supercapacitor devices
Source: Royal Society of Chemistry journal article supplement (doi:10.1039/d4se00285g), 2024-01-01
Supplement: d4se00285g1.pdf [file d4se00285g1.pdf]

## Supplementary Information

### Synergistic effect of heterointerface engineering and oxygen vacancy in electro-spun polymer fibres derived carbon-supported 1D hierarchical WO<sub>3</sub>/SnO<sub>2</sub> nanostructures for high-performance supercapacitor devices

Vaishali Tanwar, Saurabh Kumar Pathak and Pravin P Ingole\*

Department of Chemistry, Indian Institute of Technology Delhi, New Delhi, India-110016

\*Corresponding author: [ppingole@chemistry.iitd.ac.in](mailto:ppingole@chemistry.iitd.ac.in)

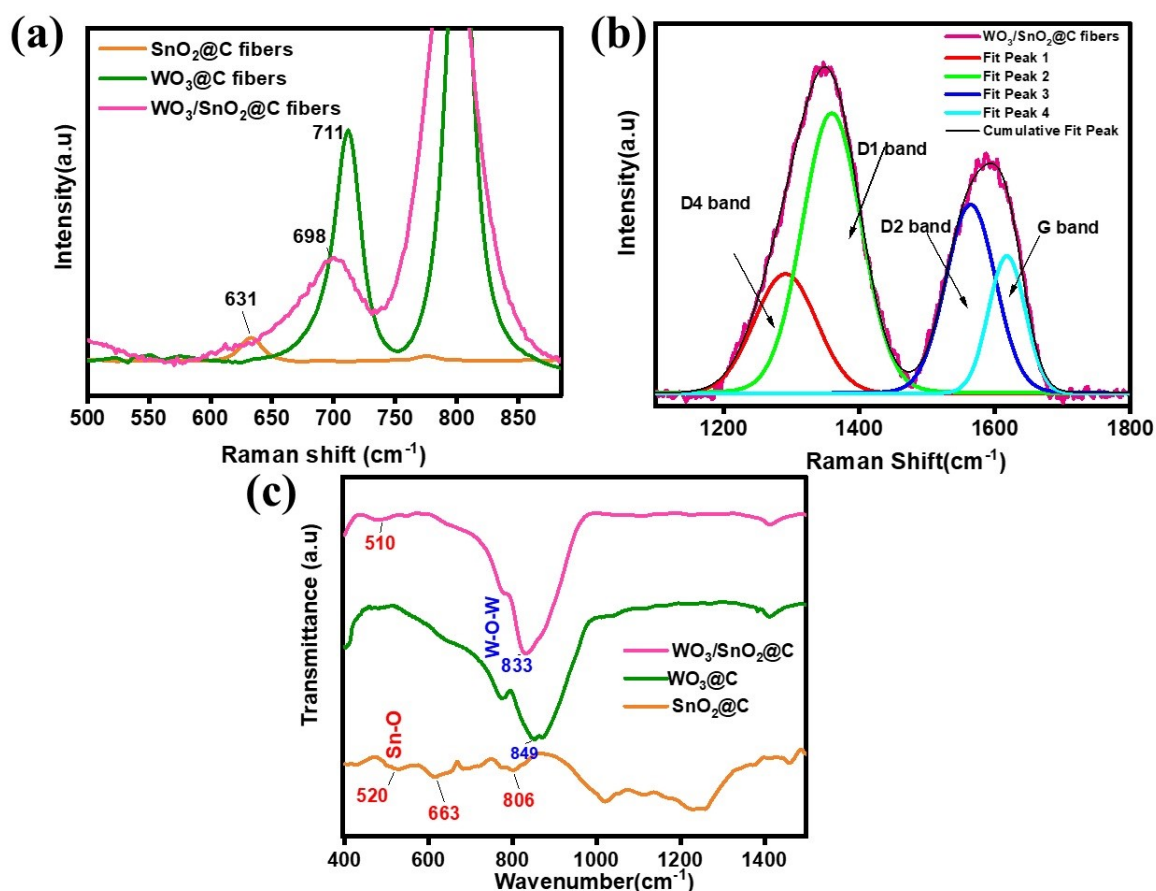

**Figure S1.** Zoomed view of Raman spectra for SnO<sub>2</sub>@C, WO<sub>3</sub>@C, and WO<sub>3</sub>/SnO<sub>2</sub>@C fibers showing (a) M-O bonds in the range of 500-850 cm<sup>-1</sup>, (b) Deconvoluted Raman Spectra using Voight Function for (c) WO<sub>3</sub>/SnO<sub>2</sub>@, (c) FTIR spectra in the wavenumber range of 1500-400 cm<sup>-1</sup>(left panel), Enlarged view (right panel) for SnO<sub>2</sub>@C, WO<sub>3</sub>@C, and WO<sub>3</sub>/SnO<sub>2</sub>@C fibers.

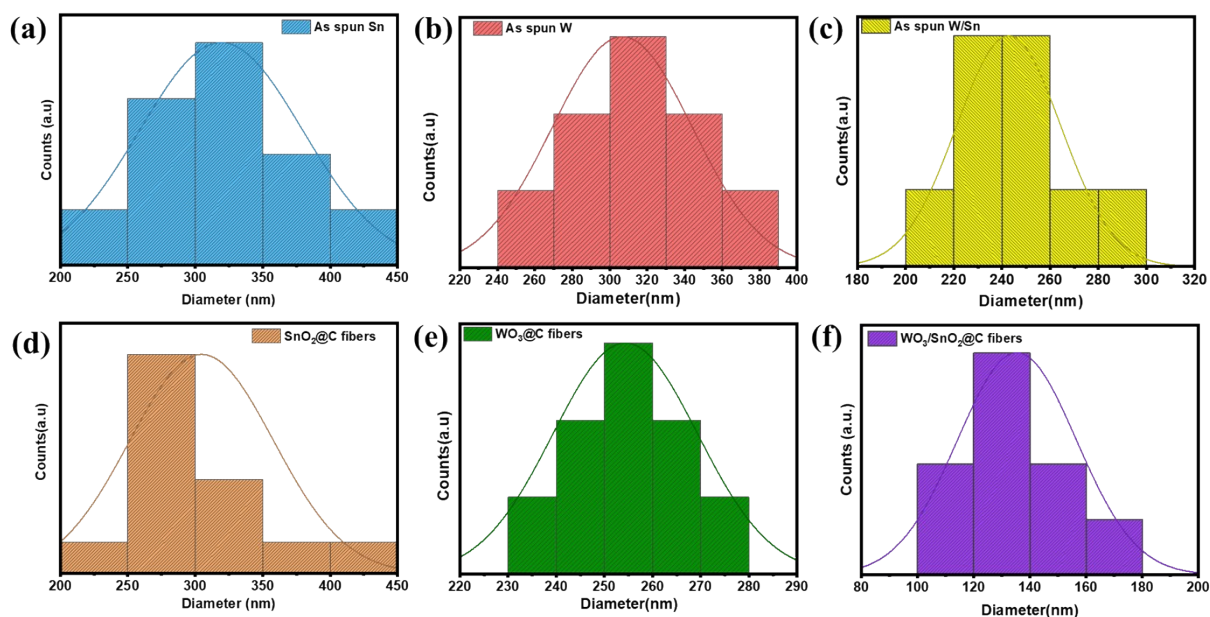

**Figure S2.** The size distribution histograms of the (a-c) as-synthesized electrospun nanofibers of SnO<sub>2</sub>, WO<sub>3</sub> and WO<sub>3</sub>/SnO<sub>2</sub>, (d-e) Calcined Fibers of SnO<sub>2</sub>@C, WO<sub>3</sub>@C, and WO<sub>3</sub>/SnO<sub>2</sub>@C fibers.

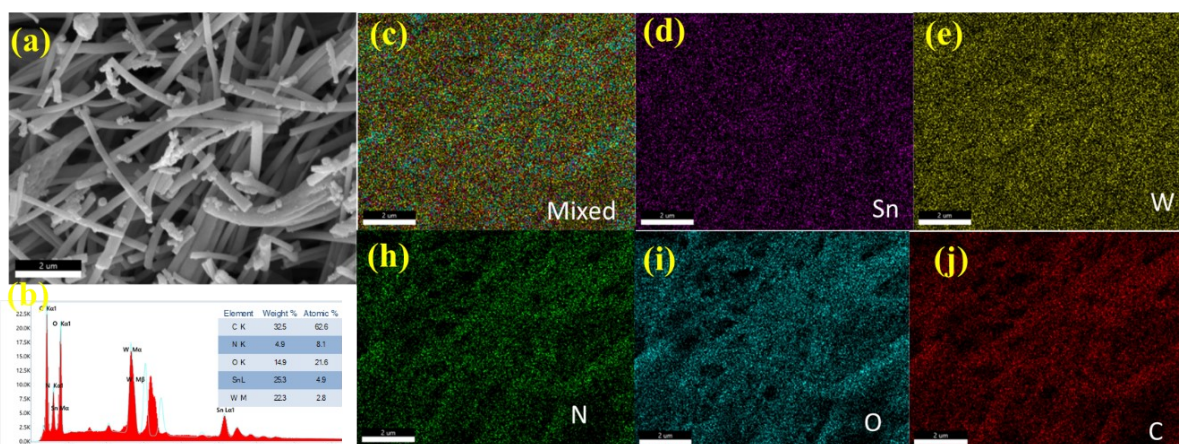

**Figure S3.** (a) FESEM image and (b) corresponding EDX spectrum of WO<sub>3</sub>/SnO<sub>2</sub>@C fibers. EDX mapping depicting (c) the mixed elemental composition, and individual elements (d - j) W, Sn, O, C, and N for WO<sub>3</sub>/SnO<sub>2</sub> fibers.

Table S1: Details of the BET surface areas and average pore diameter of MO@C fibers calculated from the N<sub>2</sub> adsorption-desorption isotherms

| Sample                               | BET Surface Area (m <sup>2</sup> g <sup>-1</sup> ) | Average Pore diameter(nm) |
|--------------------------------------|----------------------------------------------------|---------------------------|
| WO <sub>3</sub> @C                   | 8.2                                                | 12.024                    |
| SnO <sub>2</sub> @C                  | 15.4                                               | 10.181                    |
| WO <sub>3</sub> /SnO <sub>2</sub> @C | 23.1                                               | 9.2274                    |

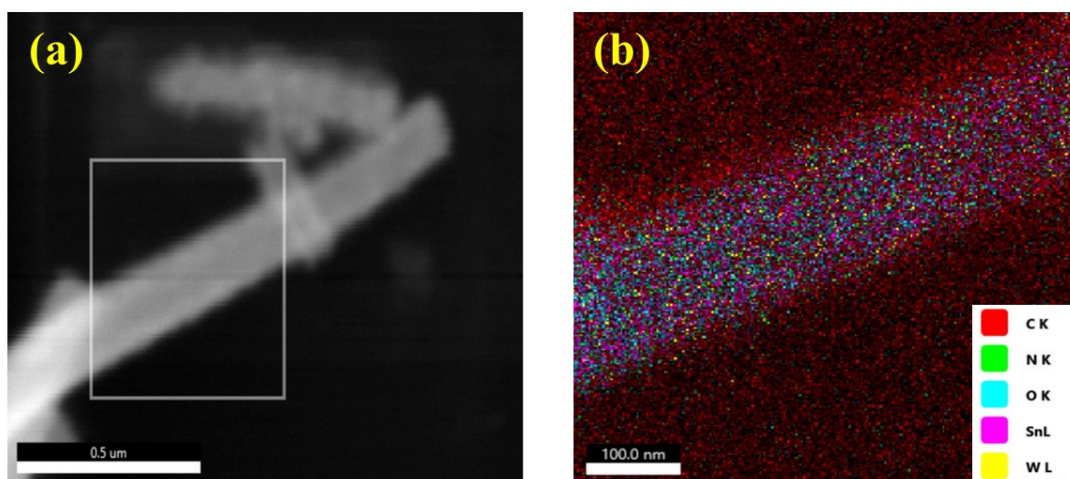

**Figure S4.** (a) STM images depicting the area of interest for EDS analysis, (b) The corresponding elemental overlap of  $\text{WO}_3/\text{SnO}_2@\text{C}$  fibers.

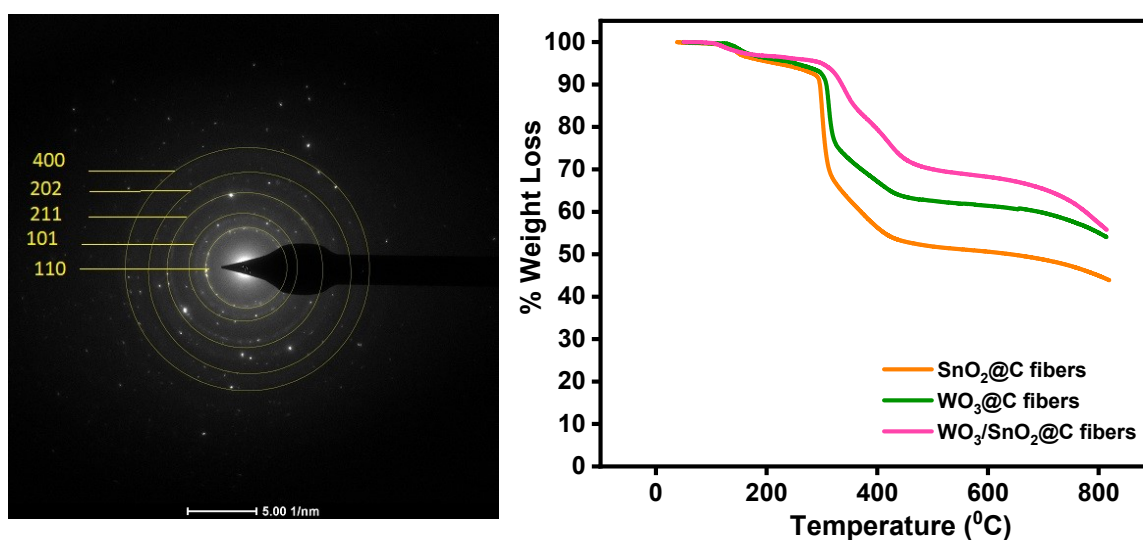

**Figure S5.** (left) SAED pattern recorded for  $\text{WO}_3/\text{SnO}_2@\text{C}$  fibers. (right) The thermogravimetric analysis of the  $\text{SnO}_2@\text{C}$ ,  $\text{WO}_3@\text{C}$ , and  $\text{WO}_3/\text{SnO}_2@\text{C}$  fibers.

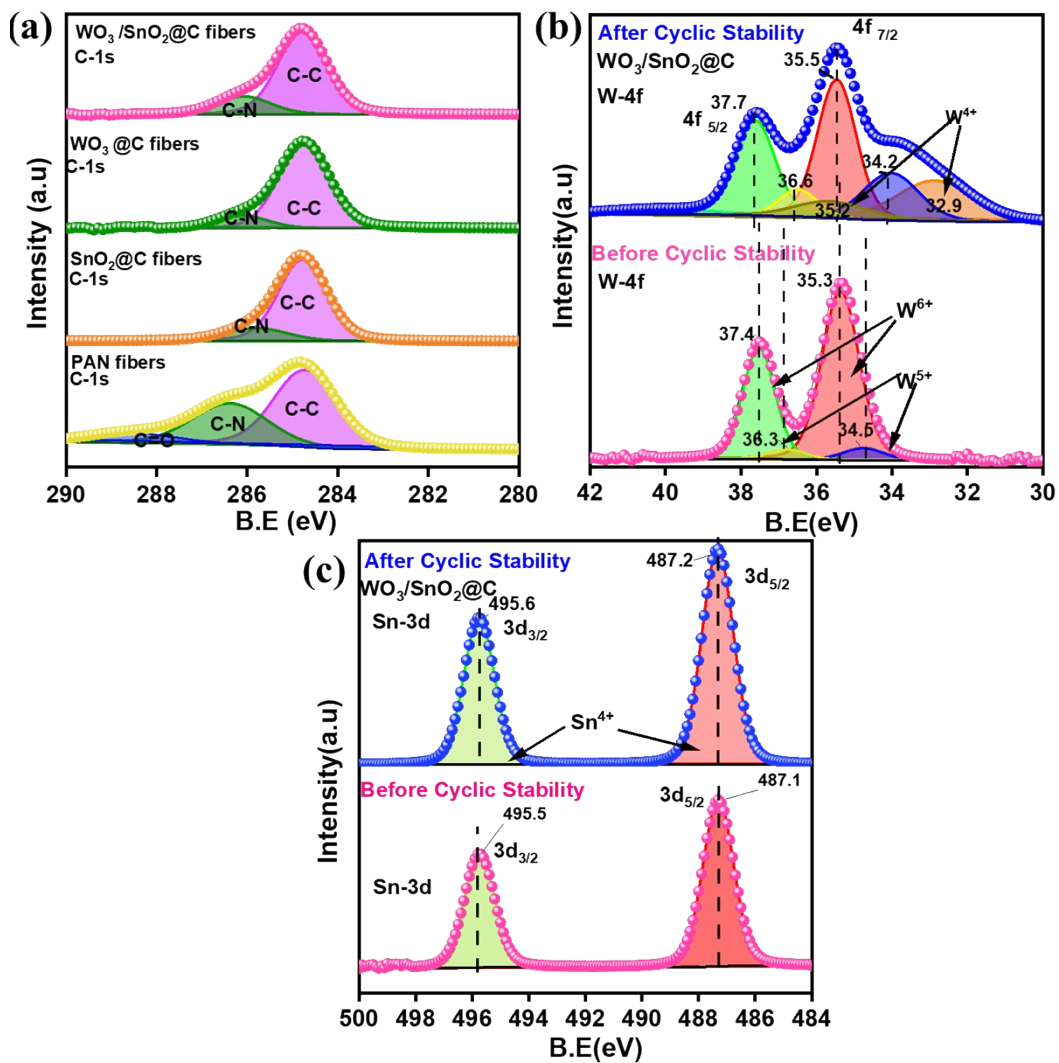

**Figure S6.** High-resolution XPS CL spectra (a) C 1s for WO<sub>3</sub>/SnO<sub>2</sub>@C, WO<sub>3</sub>@C, SnO<sub>2</sub>@C, and PAN fibers, Before and after the cycling stability (b) W-4f, (c) Sn 3d for WO<sub>3</sub>/SnO<sub>2</sub>@C.

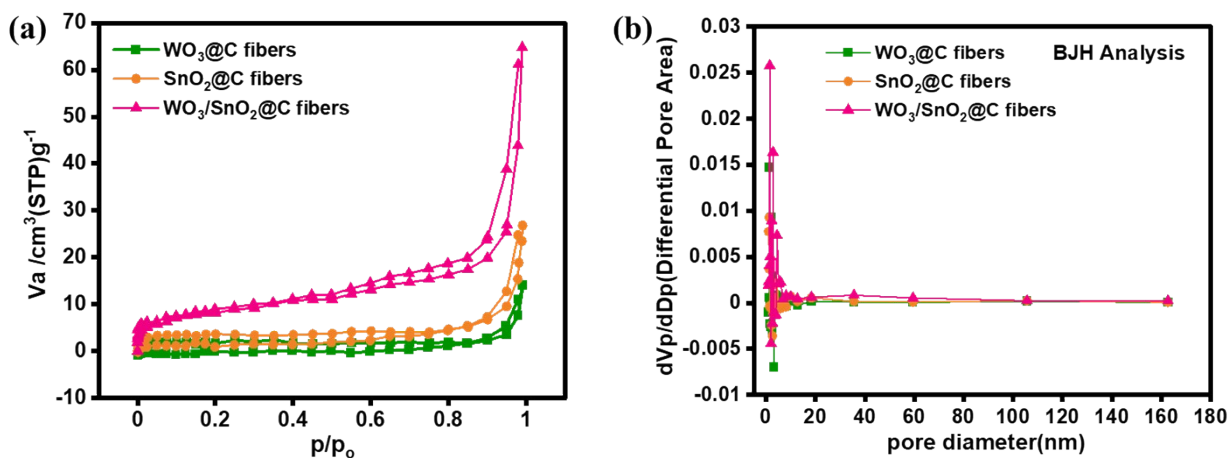

**Figure S7.** (a) The N<sub>2</sub> adsorption-desorption analysis, (b) pore size distribution via BJH analysis of the SnO<sub>2</sub>@C, WO<sub>3</sub>@C, and WO<sub>3</sub>/SnO<sub>2</sub>@C fibers.

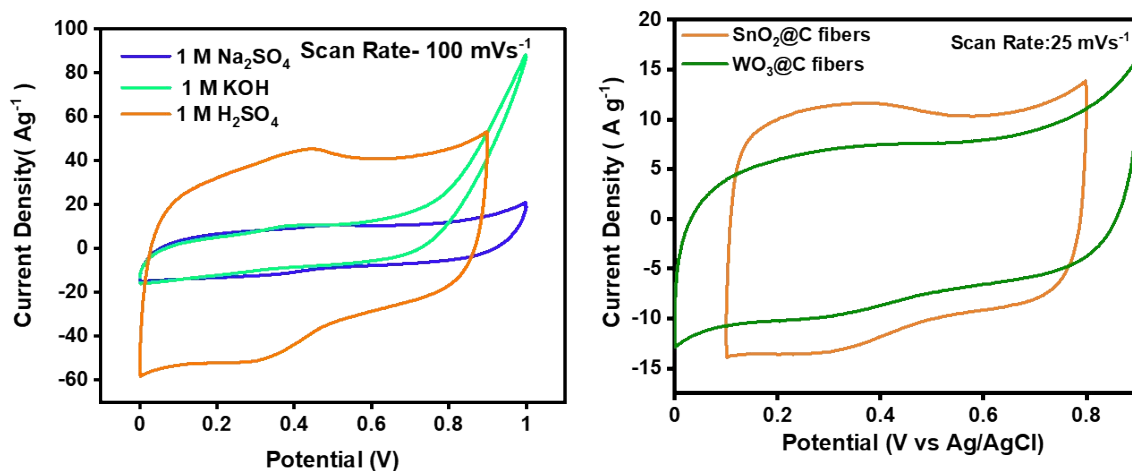

**Figure S8.** Left panel: The comparative CV curves of  $\text{WO}_3/\text{SnO}_2@\text{C}$  fibers in the potential range of 0–1 V at a scan rate of  $100 \text{ mV s}^{-1}$  in different electrolytes. Right Panel: The CV curve of  $\text{WO}_3@\text{C}$  and  $\text{SnO}_2@\text{C}$  fibers in the potential range of 0–0.8 V at a scan rate of  $25 \text{ mV s}^{-1}$

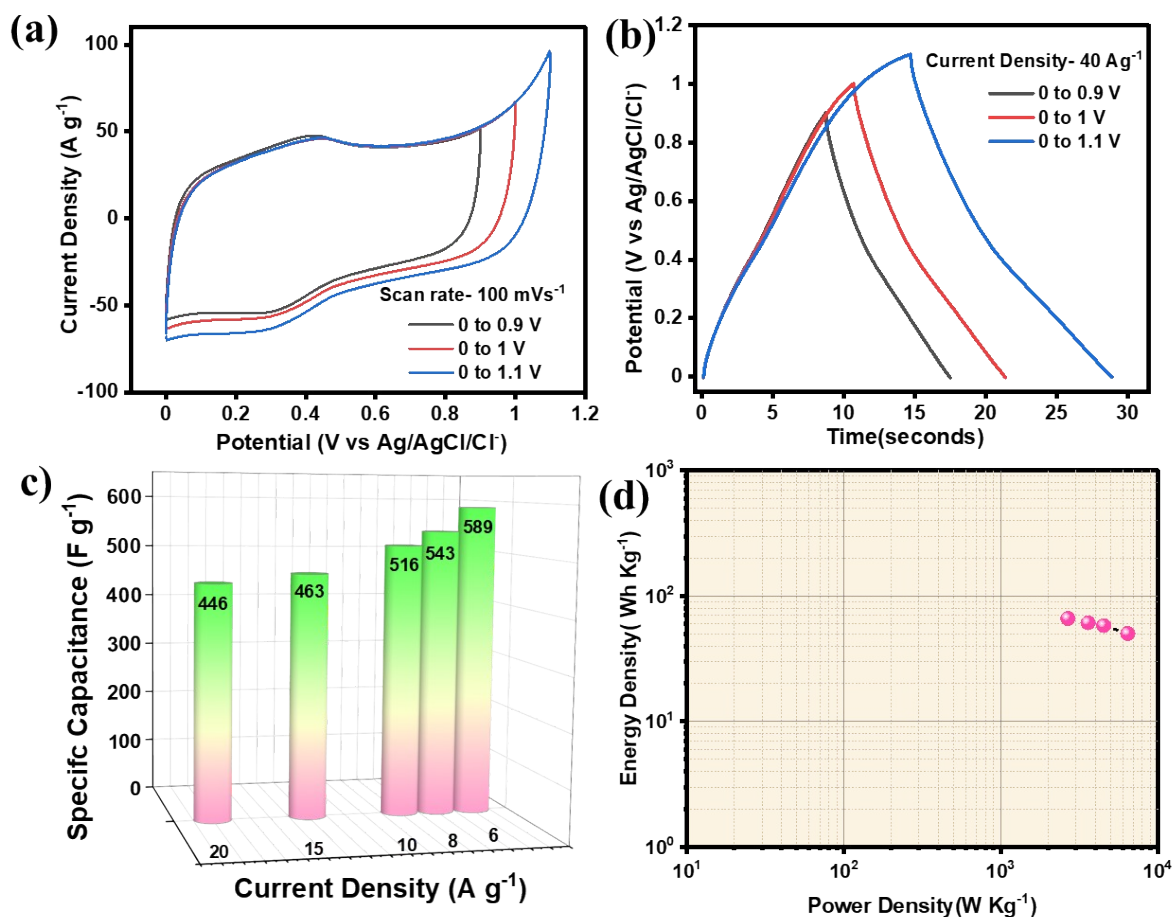

**Figure S9.** Electrochemical performance of  $\text{WO}_3/\text{SnO}_2@\text{C}$  (a) via CVs, (b) GCD at varying potential windows, (c) Variation of  $C_{\text{SP}}$  (from GCD analysis) with current density, and (d) corresponding Ragone plot.

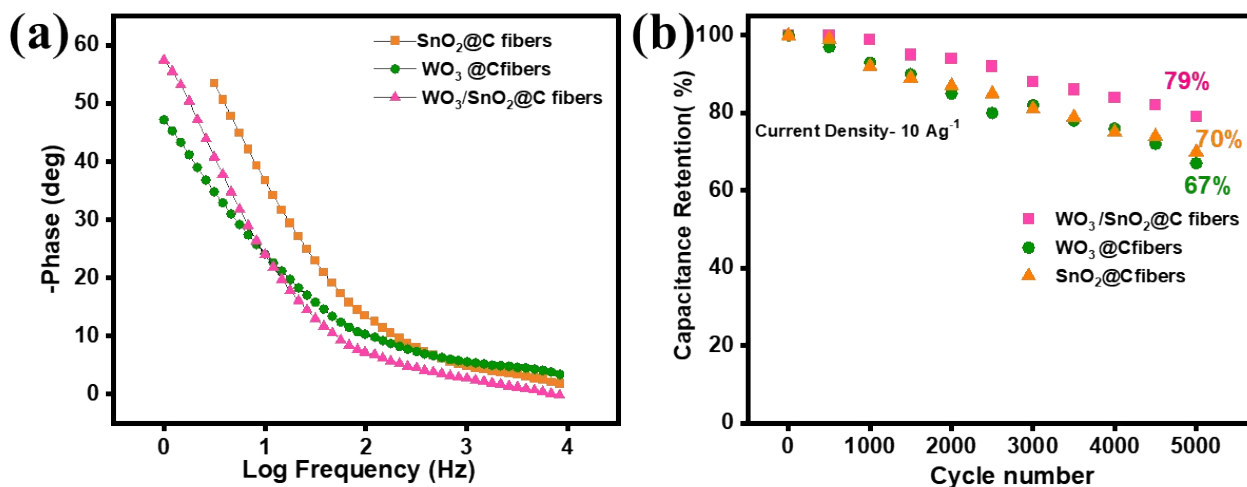

**Figure S10.** (a) The Bode phase angle plot, (b) stability stability test till 5000 cycles at 10 A g<sup>-1</sup> for WO<sub>3</sub>@C, SnO<sub>2</sub>@C, and WO<sub>3</sub>/SnO<sub>2</sub>@C fibers.

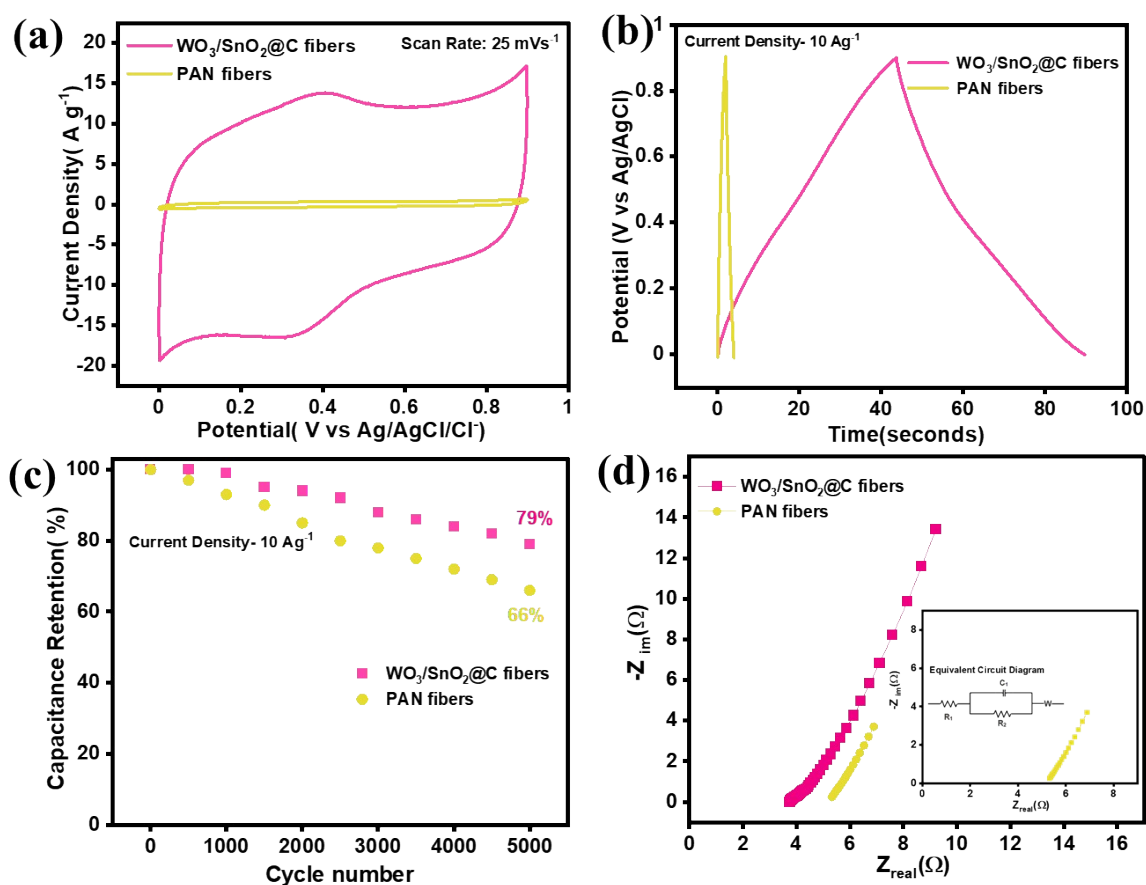

**Figure S11.** Comparison of PAN, WO<sub>3</sub>/SnO<sub>2</sub>@C, via (a) CV in the potential range of 0 to 0.9 V at 25 mVs<sup>-1</sup>; (b) GCD in the potential range of 0 to 0.9 V at 10 Ag<sup>-1</sup>; (c) cyclic stability up to

5000 cycles at  $10 \text{ A g}^{-1}$ ; (d) EIS in the frequency range 1-  $10^4 \text{ Hz}$  at OCP: Inset Zoomed EIS of PAN with Equivalent circuit elements.

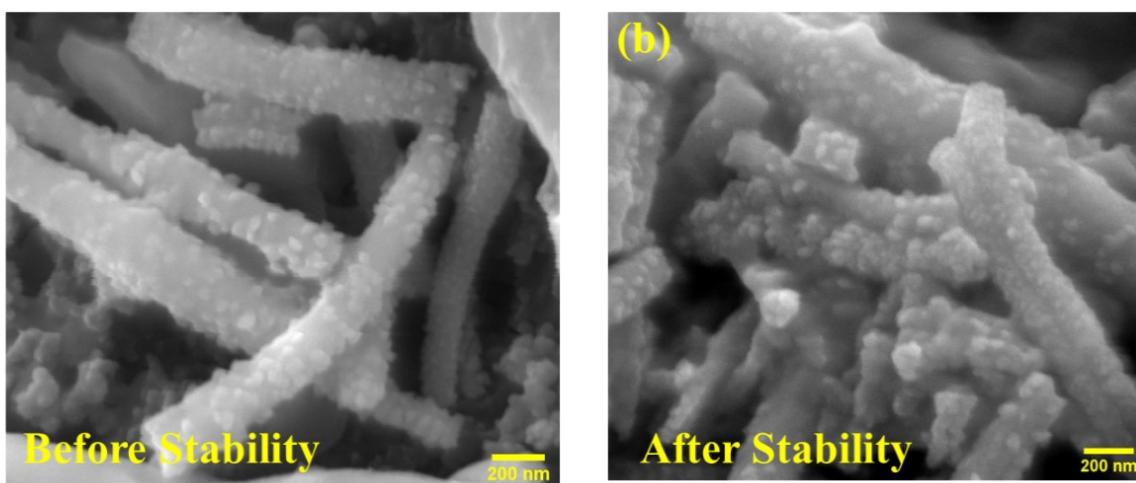

Figure S12. FESEM of  $\text{WO}_3/\text{SnO}_2@\text{C}$  before and after 5000 GCD cycles.

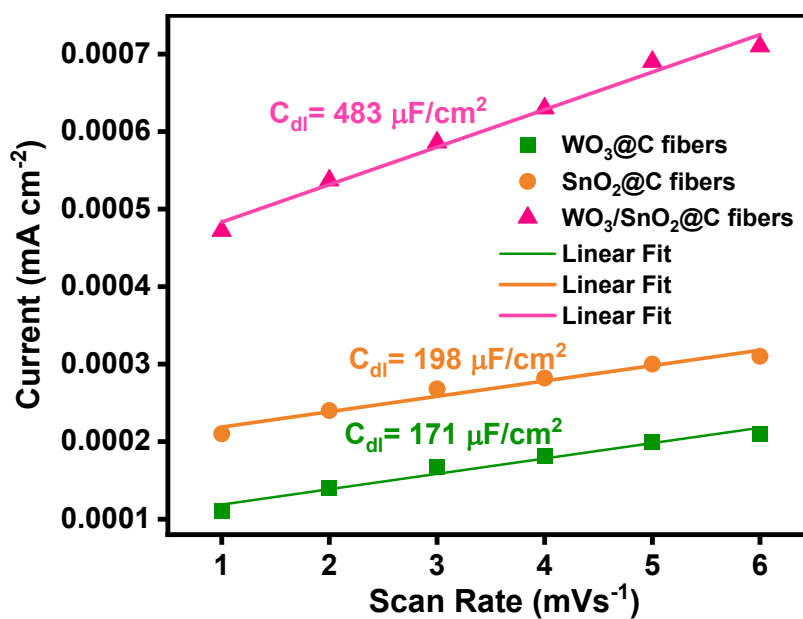

Figure S13. A comparison of  $C_{dl}$  values for  $\text{SnO}_2@\text{C}$ ,  $\text{WO}_3@\text{C}$ , and  $\text{WO}_3/\text{SnO}_2@\text{C}$  fibers.

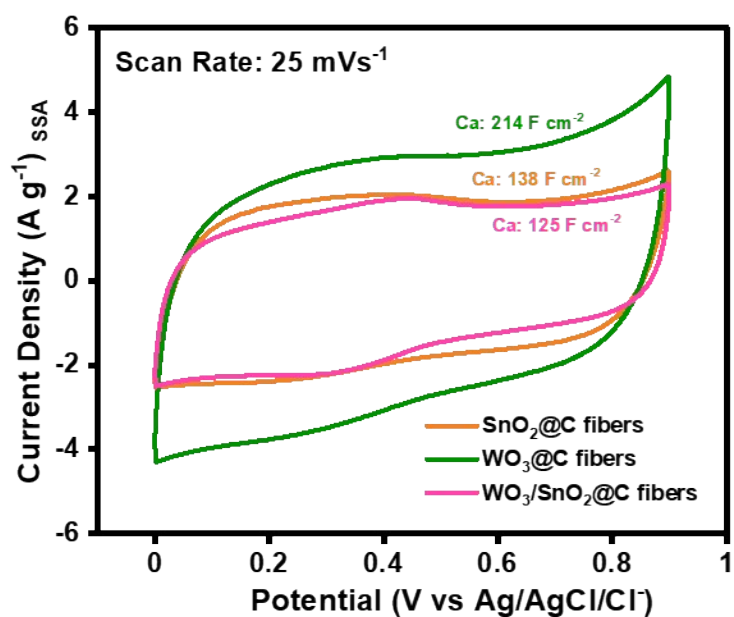

**Figure S14.** CV with current density normalized by SSA, and Ca values for  $\text{WO}_3@C$ ,  $\text{SnO}_2@C$ , and  $\text{WO}_3/\text{SnO}_2@C$  fibers

Table S2: Details of the electrochemical performance of  $\text{WO}_3/\text{SnO}_2@C$  in half configuration

| Configuration   | Csp<br>( $\text{F g}^{-1}$ ) | Current Density<br>( $\text{A g}^{-1}$ ) | Ca<br>( $\text{mF cm}^{-2}$ ) | Current<br>( $\text{mA cm}^{-2}$ ) | Cm<br>( $\text{F g}^{-1}$ ) | Scan Rate<br>( $\text{mVs}^{-1}$ ) |
|-----------------|------------------------------|------------------------------------------|-------------------------------|------------------------------------|-----------------------------|------------------------------------|
| Three-Electrode | 446                          | 20                                       | 51                            | 2                                  | 1093                        | 5                                  |
|                 | 463                          | 15                                       | 53                            | 1.5                                | 1037                        | 10                                 |
|                 | 516                          | 10                                       | 54                            | 1                                  | 1010                        | 15                                 |
|                 | 543                          | 8                                        | 59                            | 0.8                                | 930                         | 20                                 |
|                 | 589                          | 6                                        | 62                            | 0.6                                | 925                         | 25                                 |



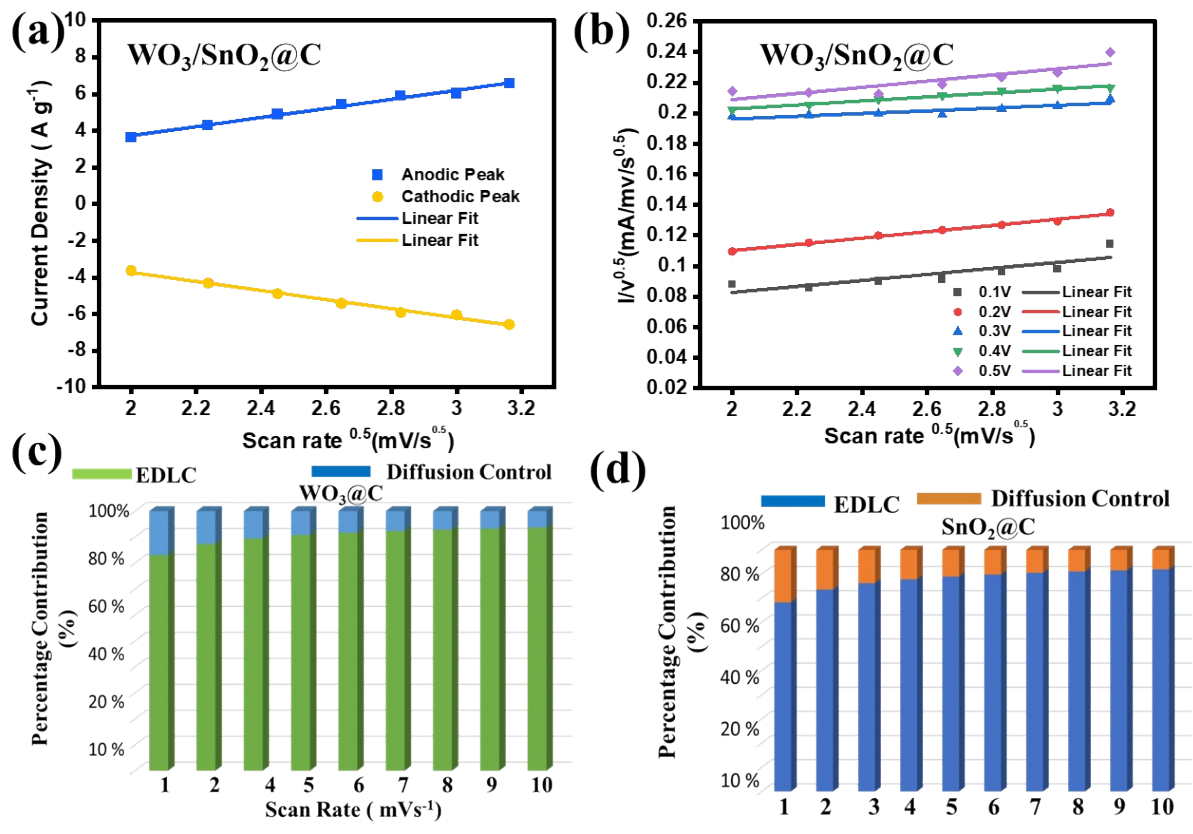

**Figure S15:** (a) anodic current density versus square root scan rate ( $v^{1/2}$ ) at peak potentials, (b)  $I/v^{0.5}$  vs  $v^{0.5}$  plot for  $\text{WO}_3/\text{SnO}_2@\text{C}$ , the percentage of capacitance contribution at different scan rates for (c)  $\text{WO}_3@\text{C}$ , (d)  $\text{SnO}_2@\text{C}$ .

Table S3: Details of the  $R_s$  and Warburg coefficient ( $\sigma$ ) of  $\text{MO}@\text{C}$  fibers calculated using the Randles circuit.

| Sample                              | $R_s$ ( $\Omega$ ) | $\sigma$ ( $\Omega \text{ s}^{-1/2}$ ) |
|-------------------------------------|--------------------|----------------------------------------|
| $\text{WO}_3@\text{C}$              | 3.3                | 101.7                                  |
| $\text{SnO}_2@\text{C}$             | 4.1                | 47.31                                  |
| $\text{WO}_3/\text{SnO}_2@\text{C}$ | 3.7                | 20.23                                  |

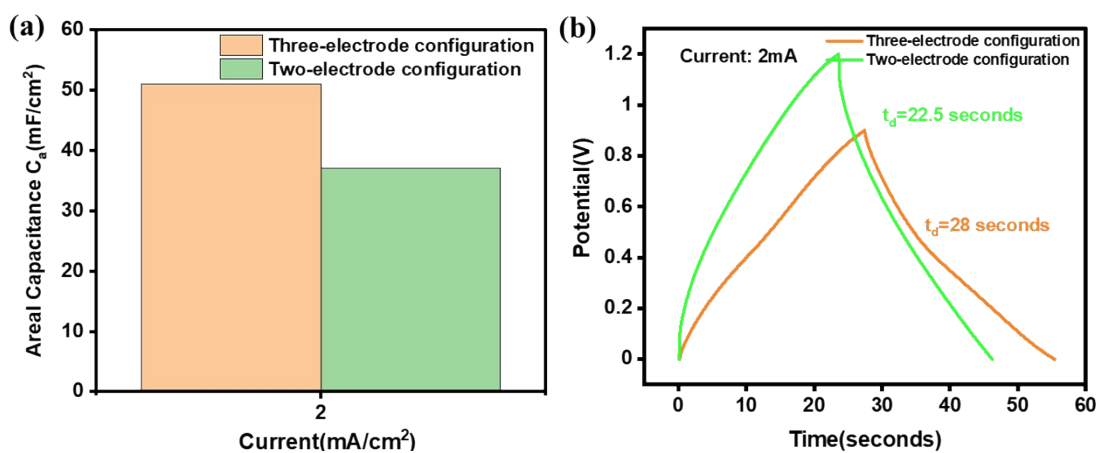

**Figure S16:** Electrochemical performance comparison of  $\text{WO}_3/\text{SnO}_2@\text{C}$  in 2-electrode and 3-electrode configurations in terms of (a) areal capacitance, and (b) galvanostatic charge-discharge profiles at a constant current of 2 mA.

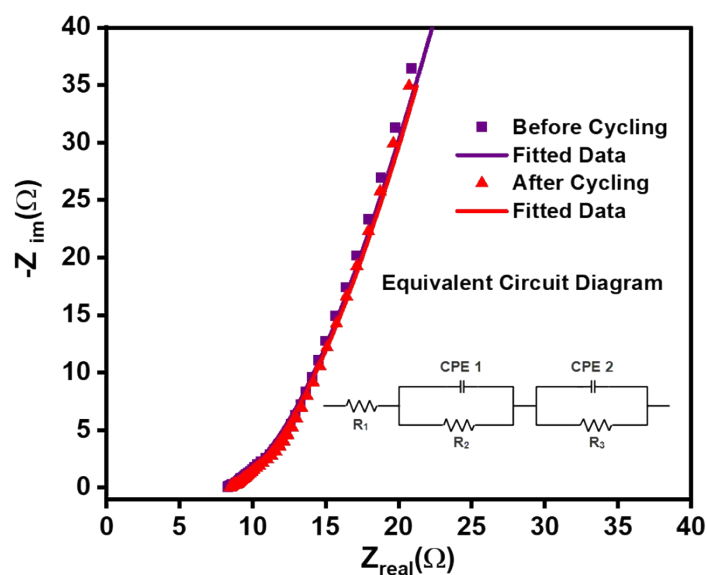

**Figure S17.** Nyquist plot for the symmetric device ( $\text{WO}_3/\text{SnO}_2@\text{C}$ ) in the frequency range 0.1 to  $10^4$  Hz
